# Supplementary material for: A Single-Cycle Influenza A Virus-Based SARS-CoV-2 Vaccine Elicits Potent Immune Responses in a Mouse Model
Source: MDPI journal article supplement (doi:10.3390/vaccines9080850), 2021-08-03
Supplement: s1 [file s1]

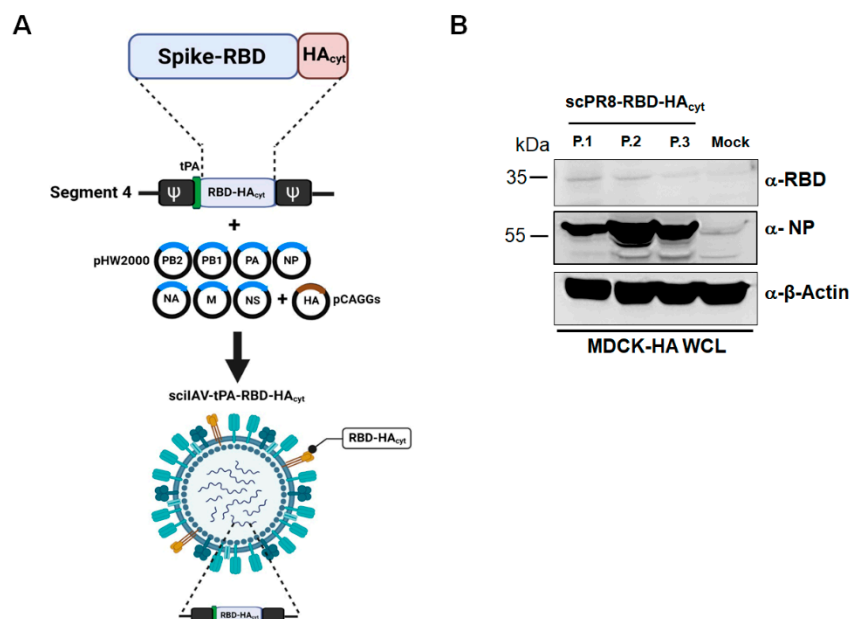

**Figure S1.** Generation of scPR8 containing receptor binding domain (RBD) of SARS-CoV-2 spike protein. (A) Schematic diagram of a reverse genetically generated scPR8-RBD-HAcyt. The RBD-HAcyt fusion gene was introduced in the segment 4 (HA) of A/PR/8/34 replacing most HA coding sequences. The packaging signal sequence (Ψ) at both 3' and 5' terminal ends are also depicted. (B) scPR8-RBD-HAcyt infected MDCK-HA were assessed for the RBD-HAcyt expression. Lysates of infected cells were subjected to Western blot analysis against α-RBD, -NP and -β actin antibodies. Mock infected MDCK-HA cells were used as a control.

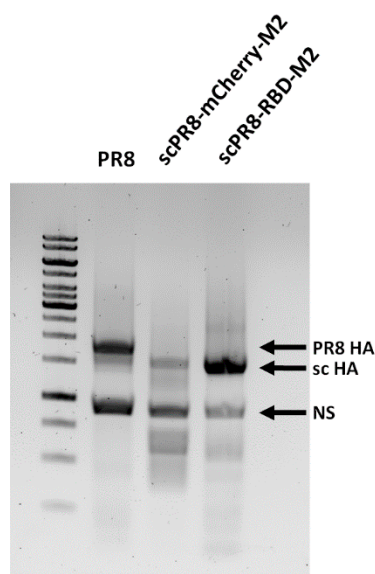

**Figure S2.** Verification of RBD-M2 and mCherry-M2 insertion in the HA-encoding segment via RT-PCR. Parental PR8, scPR8-mCherry-M2 and scPR8-RBD-M2 viruses were rescued and subjected to viral RNA isolation. RT-PCR reactions were performed using specific primers to HA and NS genes. PCR product sizes of HA gene derived from PR8, scPR8-mCherry-M2 and scPR8-RBD-M2 viruses are 1,741 bp, 1,071 bp and 1,203 bp, respectively. PCR product size of NS gene is 890 bp.
